# Supplementary material for: Evaluating patient-reported outcome measures (PROMs) for clinical trials and clinical practice in adult patients with uveitis or scleritis: a systematic review
Source: Springer Nature journal article supplement (doi:10.1186/s12348-022-00304-3), 2022-09-05
Supplement: MOESM1 [file 23454806]

## Online supplementary files

### ePanel 1 Search strategy for MEDLINE

Database: Ovid MEDLINE(R) <1946 to 5 November 2021>

1. quality of life/
2. health status/
3. health status indicators/
4. quality of life.tw.
5. health status.tw.
6. (hql or hqol or hrql or hrqol or qol).tw.
7. (symptom\$ adj4 score\$).tw.
8. (pros or pro or proms or patient-reported or health related or patient engage\$ or patient satisfaction or PROM or patient reported).ti,ab.
9. or/1-8
10. exp Uveitis/
11. uveitis.ti,ab.
12. (inflam\* adj3 sclera).ti,ab.
13. exp Scleritis/
14. scleritis.ti,ab.
15. exp Optic Neuritis/
16. optic neuritis.ti,ab.
17. or/10-16
18. 9 and 17
